# Supplementary material for: A quick and robust MHC typing method for free-ranging and captive primate species
Source: PubMed Central journal article supplement (PMC5350218; doi:10.1007/s00251-016-0968-0), 2017-01-13
Supplement: 251_2016_968_MOESM1_ESM.pdf [file 251_2016_968_MOESM1_ESM.pdf]

**Suppl. Table 1. Accession/IPD numbers of new *Paan*- and *Hymo-DRB* alleles**

| #  | Designation             | Accession Number | IPD      |
|----|-------------------------|------------------|----------|
| 1  | <i>Paan-DRB*W21:01</i>  | JQ666205         | 70007815 |
| 2  | <i>Paan-DRB*W81:01</i>  | JQ666206         | 70007816 |
| 3  | <i>Paan-DRB*W6:01</i>   | JQ666207         | 70007817 |
| 4  | <i>Paan-DRB*W6:02</i>   | JQ666208         | 70007818 |
| 5  | <i>Paan-DRB*W7:01</i>   | JQ666209         | 70007819 |
| 6  | <i>Paan-DRB*W81:02</i>  | JQ666210         | 70007820 |
| 7  | <i>Paan-DRB*W81:03</i>  | JQ666211         | 70007821 |
| 8  | <i>Paan-DRB*W1:01</i>   | JQ666212         | 70007822 |
| 9  | <i>Paan-DRB*W1:02</i>   | JQ666213         | 70007823 |
| 10 | <i>Paan-DRB*W1:03</i>   | JQ666214         | 70007824 |
| 11 | <i>Paan-DRB*W3:01</i>   | JQ666215         | 70007825 |
| 12 | <i>Paan-DRB*W4:01</i>   | JQ666216         | 70007826 |
| 13 | <i>Paan-DRB*W27:01</i>  | JQ666217         | 70007827 |
| 14 | <i>Paan-DRB*W28:01</i>  | JQ666218         | 70007828 |
| 15 | <i>Paan-DRB*W48:01</i>  | JQ666219         | 70007829 |
| 16 | <i>Paan-DRB*W53:01</i>  | JQ666220         | 70007830 |
| 17 | <i>Paan-DRB*W82:01</i>  | JQ666221         | 70007831 |
| 18 | <i>Paan-DRB*W56:01</i>  | JQ666222         | 70007832 |
| 19 | <i>Paan-DRB3*04:01</i>  | JQ666223         | 70007833 |
| 20 | <i>Paan-DRB3*04:02</i>  | JQ666224         | 70007834 |
| 21 | <i>Paan-DRB*W56:02</i>  | JQ666225         | 70007835 |
| 22 | <i>Paan-DRB3*04:03</i>  | JQ666226         | 70007836 |
| 23 | <i>Paan-DRB*W26:01</i>  | JQ666227         | 70007837 |
| 24 | <i>Paan-DRB*W57:01</i>  | JQ666228         | 70007838 |
| 25 | <i>Paan-DRB*W83:01</i>  | JQ666229         | 70007839 |
| 26 | <i>Paan-DRB*W58:01</i>  | JQ666230         | 70007840 |
| 27 | <i>Paan-DRB1*03:01</i>  | JQ666231         | 70007841 |
| 28 | <i>Paan-DRB1*07:01</i>  | JQ666232         | 70007842 |
| 29 | <i>Paan-DRB1*10:01</i>  | JQ666233         | 70007843 |
| 30 | <i>Paan-DRB*W84:01</i>  | JQ666234         | 70007844 |
| 31 | <i>Paan-DRB1*03:02</i>  | JQ666235         | 70007845 |
| 32 | <i>Paan-DRB1*03:03</i>  | JQ666236         | 70007846 |
| 33 | <i>Paan-DRB1*03:04</i>  | JQ666237         | 70007847 |
| 34 | <i>Paan-DRB1*03:05</i>  | JQ666238         | 70007848 |
| 35 | <i>Paan-DRB5*03:01</i>  | JQ666239         | 70007849 |
| 36 | <i>Paan-DRB5*03:02</i>  | JQ666240         | 70007850 |
| 37 | <i>Paan-DRB5*03:03</i>  | JQ666241         | 70007851 |
| 38 | <i>Paan-DRB5*03:04</i>  | JQ666242         | 70007852 |
| 39 | <i>Paan-DRB6*01:01</i>  | JQ666243         | 70007853 |
| 40 | <i>Paan-DRB6*01:02</i>  | JQ666244         | 70007854 |
| 41 | <i>Paan-DRB6*01:03</i>  | JQ666245         | 70007855 |
| 42 | <i>Paan-DRB6*01:04</i>  | JQ666246         | 70007856 |
| 43 | <i>Paan-DRB6*01:05</i>  | JQ666247         | 70007857 |
| 44 | <i>Paan-DRB6*01:06</i>  | JQ666248         | 70007858 |
| 45 | <i>Paan-DRB6*01:07</i>  | JQ666249         | 70007859 |
| 46 | <i>Paan-DRB6*01:08</i>  | JQ666250         | 70007860 |
| 47 | <i>Paan-DRB6*01:09</i>  | JQ666251         | 70007861 |
| 48 | <i>Paan-DRB*W036:01</i> | KX065446         | 70014381 |
| 49 | <i>Paan-DRB6*01:10</i>  | KX065447         | 70014383 |

| <b>#</b> | <b>Designation</b>      | <b>Accession Number</b> | <b>IPD</b> |
|----------|-------------------------|-------------------------|------------|
| 1        | <i>Hymo-DRB*W094:01</i> | KJ701253                | 70011945   |
| 2        | <i>Hymo-DRB*W094:02</i> | KJ701254                | 70011947   |
| 3        | <i>Hymo-DRB*W095:01</i> | KJ701255                | 70011949   |
| 4        | <i>Hymo-DRB*W096:01</i> | KJ701256                | 70011951   |
| 5        | <i>Hymo-DRB*W096:02</i> | KJ701257                | 70011953   |
| 6        | <i>Hymo-DRB1*04:01</i>  | KJ701258                | 70011955   |
| 7        | <i>Hymo-DRB1*04:02</i>  | KJ701259                | 70011957   |
| 8        | <i>Hymo-DRB1*04:03</i>  | KJ701260                | 70011959   |
| 9        | <i>Hymo-DRB1*04:04</i>  | KJ701261                | 70011961   |
| 10       | <i>Hymo-DRB*W097:01</i> | KJ701262                | 70011963   |
| 11       | <i>Hymo-DRB*W100:01</i> | KJ701263                | 70011965   |
| 12       | <i>Hymo-DRB*W098:01</i> | KJ701264                | 70011967   |
| 13       | <i>Hymo-DRB*W098:02</i> | KJ701265                | 70011969   |
| 14       | <i>Hymo-DRB*W099:01</i> | KJ701266                | 70011971   |
| 15       | <i>Hymo-DRB*W103:01</i> | LN867601                | 70011973   |
