# Supplementary material for: A quick and robust MHC typing method for free-ranging and captive primate species
Source: PubMed Central journal article supplement (PMC5350218; doi:10.1007/s00251-016-0968-0), 2017-01-13
Supplement: 251_2016_968_MOESM2_ESM.pdf [file 251_2016_968_MOESM2_ESM.pdf]

Suppl. Table 2. Deduced amino acid sequences of Paan-DRB exon 2 as defined in this study

HLA-DRB1\*01:01:01 LWQLKFECHFFNGTERVLLERCINQEESVRFDSVDVGEYRAVTELGRPDAEYWNSQKDLLEQRRRAAVDTCRHNHYGVGESFTVQRR  
Paan-DRB1\*03:01 -EYSTS-----F-D-YF----N-----F--S-----GR--I--DE--S--F-----R-----  
Paan-DRB1\*03:02 -EYSTS-----M---F-D-YF----Y-----F--S---RS-----R--Y--DE-----Y---V-----  
Paan-DRB1\*03:03 -EYSTS-----F-D-YF----Y-----F--S---RS-----R--Y--DE-----Y---V-----  
Paan-DRB1\*03:04 -EYSTS-----F-D-YF----L-----S---E--S---R--V--RA--T---N--Y--R-----  
Paan-DRB1\*03:05 -EYSTS-----Y-D-YF----Y-----K-GQ--N-----  
Paan-DRB1\*07:01 ---S-AK-----Y--H-----LM-----S---A---L--Y--K-----V-----  
Paan-DRB1\*10:01 -EYV-----Y-I-VFH-R--YA-----F-----RS-----F--K-----V-----  
Paan-DRB3\*04:01 -E-G-S-----Y-Q-HF----F-----F-----V--S-----Y--R-----  
Paan-DRB3\*04:02 -E-G-S-----Y-Q-HF----F-----F-----V--S-----Y-----NF--Y--Q-----  
Paan-DRB3\*04:03 -E-G-S-----Y-Q-HF----F-----F-----V--S-----Y-----Y--Q-----  
Paan-DRB5\*03:01 -K-D-Y-----H-Y-----DA-----V-----E--V-----RGV-----  
Paan-DRB5\*03:02 -K-D-Y-----H-D-----DA-----V--L---V-----E--V-----RGV-----  
Paan-DRB5\*03:03 -K-E-----H-Y-----D-----V-----V--I-----  
Paan-DRB5\*03:04 -K-D-----F-H-Y-----DA-----R--V--D--Q--V-----V-----  
Paan-DRB6\*01:08 -E-G-S--QI---R---Y-N-N-HKR--NL--H---FQ--M---V--N---GI--EK-DK---Y--R-F-----\*  
Paan-DRB6\*01:09 -E-G-S--QI---R-P--Y-N-N-HKR--GNL---FQ-----V--N---GI--EK-DK---Y--R-F---E--\*  
Paan-DRB6\*01:01 -E-A-C---I-----QY-D-Y-HKR--NL--H---FQ-----V--N---GI--\*K-DK--S---Y---F---E--\*  
Paan-DRB6\*01:04 -E-A-CK---I-----P-QY-N-Y-HKR--NL--H---FQ---EW-V--N---GI--\*K-DK--S---Y---F---E--\*  
Paan-DRB6\*01:10 -E-A-C---I-----Q-QY-D-Y-HKR--NL--H---FQ-----V--N---GI--\*K-DK--S---Y---F---E--\*  
Paan-DRB6\*01:02 -E-A-C---I-----Y-N-N-HKR--NL--H--L-FQ---E--V--N---GI--EK-DK---Y--R-F---E--\*  
Paan-DRB6\*01:05 -E-A-C---I-----QYPN-N-HKR--NL--H--L-FQ-A-Q---V--N---GI--EK-DK---Y---F---E-P-  
Paan-DRB6\*01:07 -E-A-C--PI-----QY-N-Y--KR--NL--H--L-FQ--Q---V--N---GI--EK-D\*---N--F---E--\*  
Paan-DRB6\*01:03 -E-A-C---I-----MQY-N-Y-HKR--NL--H--L-FQV-----V--N---GI--EK-D\*---KY--R-F---E--\*  
Paan-DRB6\*01:06 -E-A-C---I-----QY-N-Y-HKR--NL--H--L-FQ-----V--N---NGI--EK-D\*-A---Y---F---EH--  
Paan-DRB\*W1:01 -EYC-----L-LY-I-YFH---Y--Y-----V--N-----E--N-----  
Paan-DRB\*W1:02 -EYC-----LN-I-YF---Y--Y-----E-----  
Paan-DRB\*W1:03 -EYC-----LN-I-YF---Y--Y-----E-----V-----  
Paan-DRB\*W3:01 -E-A-R-----F-D-YFH---YA-----F-----RS--F---F--A-T--N--Y---V-----  
Paan-DRB\*W4:01 -EHV-S-----F--HF---NL-----E--S-----I--EK--R--N-----R-----  
Paan-DRB\*W6:01 -K-T-A-----D-HF---Y--Y--Y-----RS--F---Y--RT--E-----R--V-----  
Paan-DRB\*W6:02 -K-T-A-----D-HF---Y--Y--Y-----RS--F---Y-----R-----  
Paan-DRB\*W7:01 -Q-Q-A--R-----F--Y---Y-----RS-----A--EK--R-----R-----  
Paan-DRB\*W21:01 -E-V-S-----F--YF---Y-----S---LS---G-----K-GQ--N---V-----  
Paan-DRB\*W26:01 -E-A-S-----F--HFH---YA-----F-----A--S---Y--DT--S---F--Y-----  
Paan-DRB\*W27:01 -E-A-S-----Y-D-Y-H---F-----H-----R--I--DQ-----F--Y--R-F-----  
Paan-DRB\*W28:01 ---A-R-----F-D-Y-----LL-----F-----T--N---RQ-V--A---N-----V-----  
Paan-DRB\*W036:01 FEYCTH-----Y-V-FF--R--Y--N---FQ-----E--S-----KV--E--IF-----V-----  
Paan-DRB\*W48:01 -E-G-S-----F---YFH---F-----S---R-----K-GQ--N---Y---V-N-----  
Paan-DRB\*W53:01 -E-H-A-----D-Y-H---FL-----F-----V--NL-TR-E--RE--Q--V-----GV-----  
Paan-DRB\*W56:01 -Q-F-S-----Y-Q-HF---F-----F-----V--L---Y---Q--N---Y--R-----  
Paan-DRB\*W56:02 -E-F-S---D-----Y-Q-HF---F-----F-----A--L---Y---QA--N-----F-----  
Paan-DRB\*W57:01 -E-A-S-----Y-D-YF---Y-----F-----Q-----F--DS-----  
Paan-DRB\*W58:01 -QRDYL-----QY---YF---FL--H--F--S---E--S---R--V--D--R--\*I--R--R--V-----  
Paan-DRB\*W81:01 ---F-P-----F-D-YF---F-----F-----Q-----I--DE-----F-----GV-----  
Paan-DRB\*W81:02 ---F-P-----F-D-YF---LL-----S---Q--S---F--D--Q--V---R--V-----  
Paan-DRB\*W81:03 ---F-P-----F--HF---LL-----S---Q--S---F--D--Q--V---R--V-----  
Paan-DRB\*W82:01 -E-V-H-----F-D-YF---YA-----R--E-----  
Paan-DRB\*W83:01 -E-A-S-----F-D-Y-H---FA-----F-----S-----G-----RIA-----  
Paan-DRB\*W84:01 -E-A-C-----Y--YM---YA-----F-----N--R--V--D--R--IF-----
