# Supplementary material for: A quick and robust MHC typing method for free-ranging and captive primate species
Source: PubMed Central journal article supplement (PMC5350218; doi:10.1007/s00251-016-0968-0), 2017-01-13
Supplement: 251_2016_968_MOESM3_ESM.pdf [file 251_2016_968_MOESM3_ESM.pdf]

Suppl. Table 3. *Paan-DRB* alleles identical to *Paur-DRB* alleles

|                       |                        |
|-----------------------|------------------------|
| <i>Paur-DRB1*0301</i> | <i>Paan-DRB1*03:02</i> |
| <i>Paur-DRB5*0302</i> | <i>Paan-DRB5*03:04</i> |
| <i>Paur-DRB1*0302</i> | <i>Paan-DRB1*03:04</i> |
| <i>Paur-DRB6*0101</i> | <i>Paan-DRB6*01:01</i> |
| <i>Paur-DRB*W301</i>  | <i>Paan-DRB*W3:01</i>  |
| <i>Paur-DRB*W101</i>  | <i>Paan-DRB*W1:01</i>  |
| <i>Paur-DRB6*0103</i> | <i>Paan-DRB6*01:05</i> |
| <i>Paur-DRB*W2801</i> | <i>Paan-DRB*W28:01</i> |
| <i>Paur-DRB*W2701</i> | <i>Paan-DRB*W27:01</i> |
| <i>Paur-DRB5*0301</i> | <i>Paan-DRB5*03:01</i> |
| <i>Paur-DRB*W5601</i> | <i>Paan-DRB*W56:01</i> |
