# Supplementary material for: A quick and robust MHC typing method for free-ranging and captive primate species
Source: PubMed Central journal article supplement (PMC5350218; doi:10.1007/s00251-016-0968-0), 2017-01-13
Supplement: 251_2016_968_MOESM4_ESM.pdf [file 251_2016_968_MOESM4_ESM.pdf]

|                    |                                                                                              |
|--------------------|----------------------------------------------------------------------------------------------|
| HLA- DRB1*01:01:01 | RFLWQLKFECHFFNGTERTVRLLERCIYNQEEESVRFDSVDVGEYRAVTELGRPDAEYWNSQKDLLEQRRAAVDTCRHNHYGVGESFTVQRR |
| HLA- DRB5*01:01:01 | ---Q-D-Y-----F-H-D-----DL-----F--D-----                                                      |
| HLA- DRB5*01:02:01 | ---Q-D-Y-----F-H-G-----N-----F--D-----                                                       |
| Patr-DRB5*03:10    | ---K-D-Y-----F-H-YF-----DL-----I--R--E-----                                                  |
| Patr-DRB5*03:01    | ---K-D-Y-----F-H-G-----DL-----I--R--D--F-----L-----                                          |
| Patr-DRB5*03:06    | ---K-D-C-----F-H-D-----DL-----I--R-----L-----                                                |
| HLA- DRB1*01:03:01 | -----I--DE-----                                                                              |
| HLA- DRB1*01:01:01 | -----                                                                                        |
| Patr-DRB1*10:01    | ---E-A-C-----F--R-H--D-----I-A--D--F-----                                                    |
| HLA- DRB1*10:01:01 | ---EEV-----RVH--YA-Y-----R-----                                                              |
| Hymo-DRB*W100:01   | ---E-V-Y-----Q--RVH--YA-----I--E--V-----                                                     |
| Patr-DRB1*02:01    | ---L-P-G-----F--D-----FM-----V--C--I--A--N-----                                              |
| HLA- DRB1*15:01:01 | ---P-R-----F-D-YF-----F-----I--A-----V-----                                                  |
| HLA- DRB7*01:01:01 | ---E-A-S-----LY-*YF-----Y--N--M--F-----I--K--E--N*-----V-R-----                              |
| Patr-DRB7*01:01    | ---E-A-S-----LY-*YF-----Y--N--M--F-----I--K--E--N-----V-R-----                               |
| Patr-DRB6*03:05    | ---E-A-C--I-----QY-N-Y-HKR--NL-----E-FQ-----Q-V--N-----GI--EK-DK-----Y--R-F*--S---*          |
| Patr-DRB6*01:08    | ---EKA-C--I--K--QY-N-Y-HKR--NL-----E-FQ-----V--N-----GI--EK-DK--I--Y--F-----PS               |
| HLA- DRB6*02:01    | ---E-A-C--I--MK--QY-N-Y-HKR--NL-----N-E-FQ-----V--N-----GIP-EK-DKM-D--Y--F*ELHSAAA           |
| HLA- DRB4*01:01:01 | ---E-A-C--L-----WN-I-Y-----YA-YN--L--Q-----R--E-----Y--V-----                                |
| Patr-DRB4*01:04    | ---E-A-H--L-----WN-I-Y-----YA-YN--L--Q-----K-----RT--E-----Y--V-----*                        |
| HLA- DRB3*01:01:02 | ---ELR-S-----Y-D-YFH--FL-----V--S-----K-GR--N-----                                           |
| Hymo-DRB*W101:01   | ---E-A-A-----Y-Q-YF--FL-----E--N-----F--K-GQ--N-----                                         |
| Hymo-DRB*W099:01   | ---E-A-S-----F--YF--Y-----N-----F--K-GR--N-----                                              |
| Hymo-DRB*W098:01   | ---E-A-S-----F--YF--Y-----W-----S-K-----I--K-GR--N-----                                      |
| Hymo-DRB*W098:02   | ---E--NS-----F--YF--Y-----W-----S-K-----F--K-GQ--N-----                                      |
| Hymo-DRB*W094:01   | ---E-A-A-----HF--F-----N-----F-----E--N-----V-----                                           |
| Hymo-DRB*W094:02   | ---E-A-A-----HF--F-----N-----F-----N-----                                                    |
| Hymo-DRB*W095:01   | ---E-A-S-----F-D-Y-H--IL-----N-----F-----N-----F-----                                        |
| Hymo-DRB*W097:01   | C--E-V-S-----M--F--Y-H--F-----N-----RK-GQ--N-----GV-----                                     |
| Hymo-DRB*W096:01   | ---E-G-A-----Y--Y-H--F-----N-----EA-----N-----                                               |
| Hymo-DRB*W096:02   | ---E-G-A-----Y--Y-H--F-----N-----K-----N-----V-----                                          |
| Patr-DRB1*03:02    | ---EYSTS-----F-D-YFH--Y-----V--S-----I--D--GQ--N-----                                        |
| HLA- DRB1*11:01:01 | ---EYSTS-----F-D-YF--Y-----F-----E-----F--D-----                                             |
| HLA- DRB1*13:02:01 | ---EYSTS-----F-D-YFH--N-----F-----I--DE-----                                                 |
| Patr-DRB1*03:07    | ---EYSTS-----F-D-YFH-----F-----YV-DE-----A-----                                              |
| Mamu-DRB1*04:04    | ---E-V-H-----F-D-YF--Y-----F--D--Q--V-----V-----                                             |
| Hymo-DRB1*04:04    | ---E-V-H-----F-D-YF--Y-----N-----F-----N-----                                                |
| Hymo-DRB1*04:03    | ---E-V-H-----F-D-YF--Y-----Q-----EA-----N-----                                               |
| Hymo-DRB1*04:01    | ---E-V-H-----F-D-YF--Y-----Q-----K-GR--N-----V-----                                          |
| Hymo-DRB1*04:02    | ---E-V-H-----F-D-YF--Y-----S-----F--K-GR--N-----                                             |
| HLA- DRB1*04:01:01 | ---E-V-H-----F-D-YF-H--Y-----K-----                                                          |
| HLA- DRB1*07:01:01 | ---G-YK-----QF--LF--F-----V--S-----I--D--GQ--V-----                                          |
| Patr-DRB1*07:01    | ---S-YK-----QF--LF--F-----V--S-----D--GQ--V-----L--I-----                                    |
