# Supplementary material for: A quick and robust MHC typing method for free-ranging and captive primate species
Source: PubMed Central journal article supplement (PMC5350218; doi:10.1007/s00251-016-0968-0), 2017-01-13
Supplement: 251_2016_968_MOESM5_ESM.pdf [file 251_2016_968_MOESM5_ESM.pdf]

| <b>DRB alleles</b>       | <b>Part 1<br/>(GT)n</b> | <b>Part 2<br/>mixed</b>                 | <b>Part 3<br/>(GA)n</b> | <b>Part 4<br/>(GC)n</b> |
|--------------------------|-------------------------|-----------------------------------------|-------------------------|-------------------------|
| <i>HLA-DRB1*13:02:01</i> | (GT)20,30,31            | (GA)10-12CA(GA)3CA                      | (GA)6                   | (GC)2                   |
| <i>Patr-DRB1*03:07</i>   | (GT)11-13               |                                         | (GA)17-23               | (GC)2                   |
| <i>HLA-DRB1*11:01:01</i> | (GT)22-26               | (GA)5CA(GA)3CA                          | (GA)6                   | (GC)2                   |
| <i>Patr-DRB1*03:02</i>   | (GT)23-28               | (GA)5AA                                 | (GA)6                   | (GC)4                   |
| <i>HLA-DRB3*01:01:02</i> | (GA)3(GT)13,14          | (GA)9,10GGAA(GA)2CA(GA)3GG              | GA                      | (GC)3                   |
| <i>Patr-DRB1*07:01</i>   | (GT)2GGTT(GT)14         | (GA)4GC                                 | (GA)2                   | CCGC                    |
| <i>HLA-DRB1*07:01:01</i> | (GT)11                  | (GA)8GC                                 | (GA)2                   | CCGC                    |
| <i>HLA-DRB1*15:01:01</i> | (GT)15-20               | (GA)5-6CA(GA)4CA(GA)3GGAA               | (GA)6                   | (GC)2                   |
| <i>Patr-DRB1*02:01</i>   | GTGA(GT)19-22           | (GA)12-14CA(GA)4CA(GA)3GGAA             | (GA)6-7                 | (GC)2                   |
| <i>HLA-DRB1*01:03:01</i> | (GT)16                  | AAGAAA                                  | (GA)4                   | (GC)3                   |
| <i>HLA-DRB1*01:01:01</i> | (GT)16,17               | AAGAAA                                  | (GA)4                   | (GC)3                   |
| <i>Hymo-DRB*W098:01</i>  | (GT)6CT(GT)8,9          |                                         | (GA)14                  | GC                      |
| <i>Hymo-DRB*W098:02</i>  | GTGA(GT)5GA(GT)7        | (GA)2(CA)2                              | (GA)4                   | GC                      |
| <i>Hymo-DRB*W099:01</i>  | (GT)6,7CT(GT)13         |                                         | (GA)11-13               | GC                      |
| <i>Hymo-DRB1*04:01</i>   | (GT)21-24               | GA(CA)2                                 | (GA)4                   | GC                      |
| <i>Hymo-DRB1*04:02</i>   | (GT)19                  | GA(CA)2                                 | (GA)4                   | GC                      |
| <i>Hymo-DRB1*04:04</i>   | (GT)21                  | GA(CA)2                                 | (GA)4                   | GC                      |
| <i>Hymo-DRB1*04:03</i>   | (GT)12                  | (GA)2(CA)2                              | (GA)4                   | GC                      |
| <i>HLA-DRB1*04:01:01</i> | (GT)21-22               |                                         | (GA)15,16               | (GC)2                   |
| <i>HLA-DRB1*10:01:01</i> | (CT)2(GT)16             |                                         | (GA)8                   | (GC)3                   |
| <i>Hymo-DRB*W100:01</i>  | (GT)4GA(GT)2TT(GT)5     | (GA)12GGAA                              | GA                      | GC                      |
| <i>Patr-DRB1*10:01</i>   | (GT)9-10                | (GA)11-12)CA(GA)4AA                     | (GA)5                   | (GC)3                   |
| <i>HLA-DRB5*01:01:01</i> | (GT)18-24               | (GA)5-8GGAA(GA)4CA(GA)2GG               | GA                      | (GC)3                   |
| <i>HLA-DRB5*01:02:01</i> | (GT)22                  | (GA)8GGAA(GA)4CA(GA)7GGAA(GA)4CA(GA)2GG | GA                      | (GC)3                   |
| <i>Patr-DRB5*03:10</i>   | (GT)4GA(GT)7            | (GA)10GGAA(GA)4CA(GA)2GG                | GA                      | (GC)3                   |
| <i>Patr-DRB5*03:01</i>   | (GT)4GA(GT)7            | (GA)10GGAA(GA)4CA(GA)2GG                | GA                      | (GC)3                   |
| <i>Patr-DRB5*03:06</i>   | (GT)4GA(GT)7            | (GA)10GGAA(GA)4CA(GA)2GG                | GA                      | (GC)3                   |
| <i>Hymo-DRB*W096:01</i>  | (GT)20                  | (GA)2(CA)2                              | (GA)4                   | GC                      |
| <i>Hymo-DRB*W096:02</i>  | (GT)13                  | GA(CA)2                                 | (GA)4                   | GC                      |
| <i>Hymo-DRB*W097:01</i>  | GC(GT)20                | GACA                                    | (GA)7                   | GC                      |
| <i>Hymo-DRB*W095:01</i>  | (GT)20-25               | GG(CA)2                                 | (GA)4                   | GC                      |
| <i>Hymo-DRB*W094:01</i>  | (GT)18                  | GG(CA)2                                 | (GA)4                   | GC                      |
| <i>Hymo-DRB*W094:02</i>  | (GT)18,19               | GG(CA)2                                 | (GA)4                   | GC                      |
| <i>Patr-DRB6*01:08</i>   | (GT)4                   | GAGGGCA(GG)2TC(GG)3GCAG                 | (GA)6                   |                         |
| <i>Patr-DRB6*03:05</i>   | (GT)4                   | GGGAGGA(GG)3GTGGA(GG)2CCGATAGG          | (GA)8                   |                         |
| <i>HLA-DRB6*02:01</i>    | (GT)13-24               |                                         | (GA)11-14               |                         |
| <i>HLA-DRB4*01:01:01</i> | GTAT(GT)9-11            | (GA)9-14(CAGA)1,2GGAA                   | (GA)5                   | GC(GT)1,2(GC)1,2        |
| <i>Patr-DRB4*01:04</i>   | GTAT(GT)4-5             | (GA)8-9(CAGA)2(GA)10CAGATGAA(GA)3AA     | GA                      | GCGT(GC)2               |
| <i>HLA-DRB7*01:01:01</i> | (GT)2TT(GT)3T           | (GA)5(CA)6                              |                         |                         |
| <i>Patr-DRB7*01:01</i>   | (GT)2TT(GT)3T           | (GA)6(CA)5                              |                         |                         |
